# Supplementary material for: Enhancing predictions of antimicrobial resistance of pathogens by expanding the potential resistance gene repertoire using a pan-genome-based feature selection approach
Source: PubMed Central journal article supplement (PMC9011928; doi:10.1186/s12859-022-04666-2), 2022-04-15
Supplement: 12859_2022_4666_MOESM1_ESM.pdf [file 12859_2022_4666_MOESM1_ESM.pdf]

Enhancing predictions of antimicrobial resistance of pathogens by expanding the potential resistance gene repertoire using a pan-genome-based feature selection approach

Ming-Ren Yang and Yu-Wei Wu

Additional Materials

Figures S1-S4

Tables S1-S7

Figure S1

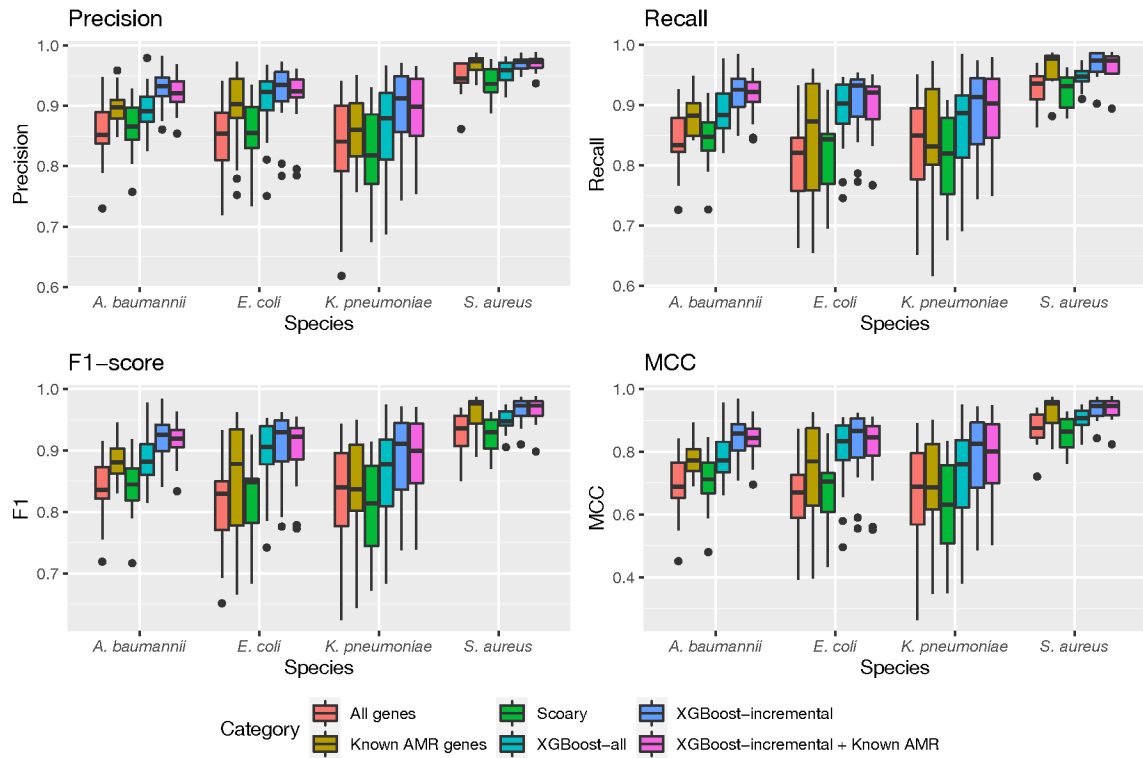

Figure S1. Boxplots indicating different prediction accuracy metrics of different gene sets for antimicrobial resistance (AMR) prediction problems. The metrics include (A) precision, (B) recall, (C) F<sub>1</sub>-score, and (D) Matthews correlation coefficient (MCC).

Figure S2

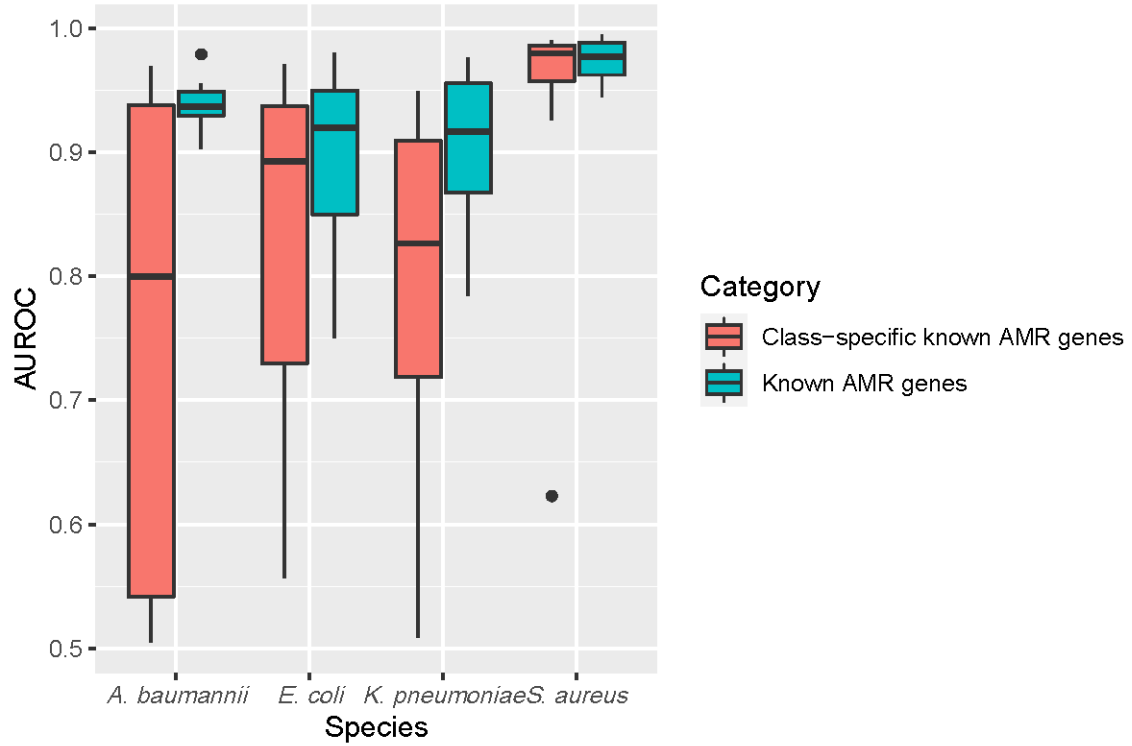

Figure S2. The prediction performance comparison between using all AMR genes and antibiotic-class-specific AMR genes. Y-axis indicates the prediction performance in terms of Area Under Receiver Operating Characteristics (AUROC) curve.

Figure S3

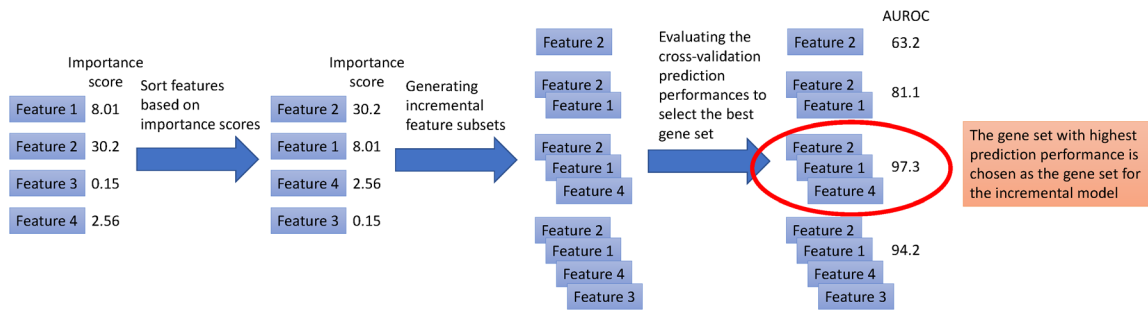

Figure S3. An illustrating example showing how the incremental approach works. Given four features with different importance scores (evaluated by XGBoost), the features are first sorted into descending order, and the incremental approach is going to start from an empty set and gradually add features, one by one, into the empty set and evaluate the prediction performances the current feature set using cross validation. The feature set with the highest prediction performance is then extracted and output as the feature set for the incremental model.

Figure S4

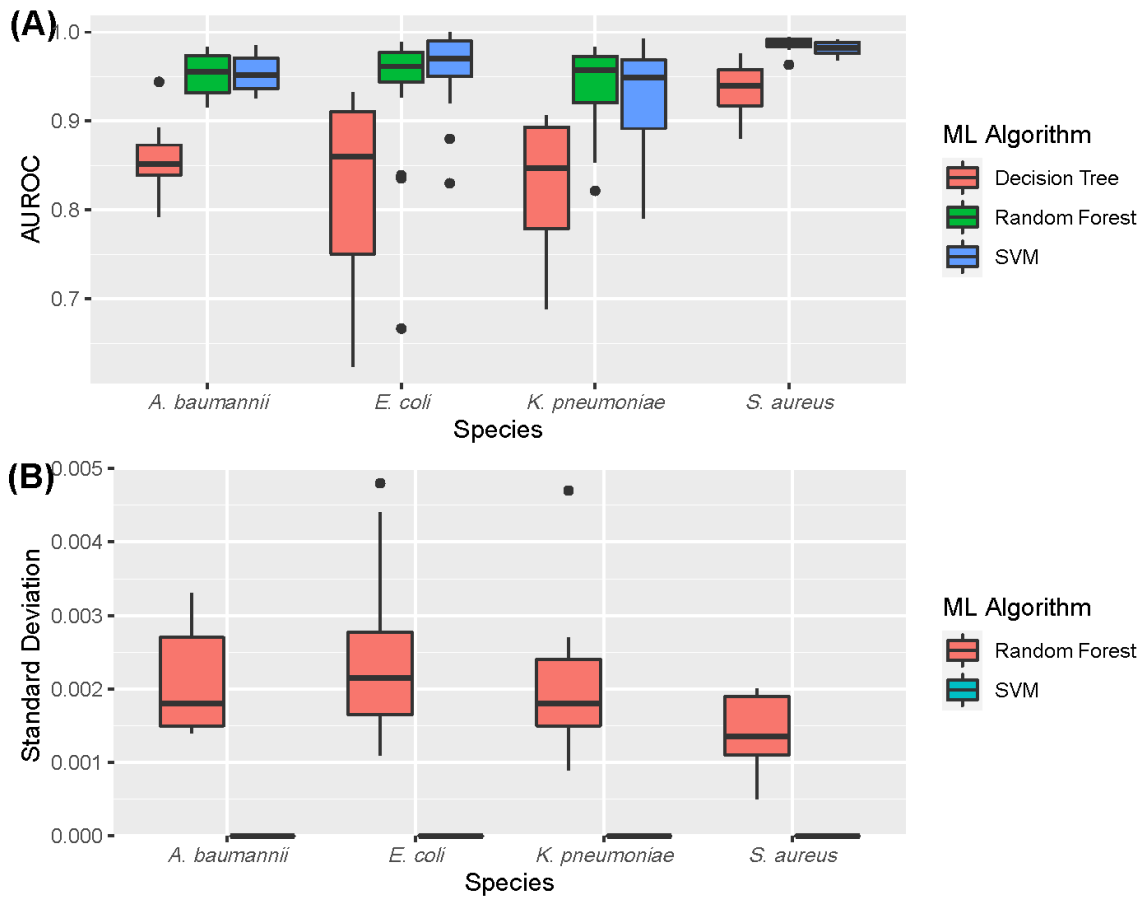

Figure S4. Comparison of different machine learning algorithm performances for the incremental model. (A) Boxplot indicates the prediction performances of different algorithms, including SVM, decision tree and random forest; (B) standard deviation distribution of ten repeated model runs for SVM and random forest.

Table S1. Numbers of resistant and susceptible strains for the selected drugs of *Acinetobacter baumannii*. Yellow entries indicate the drug datasets analyzed in this study.

| Antibiotic drugs              | Resistant | Susceptible |
|-------------------------------|-----------|-------------|
| Imipenem                      | 595       | 635         |
| ciprofloxacin                 | 1035      | 98          |
| gentamicin                    | 996       | 100         |
| amikacin                      | 580       | 461         |
| ceftazidime                   | 858       | 144         |
| trimethoprim/sulfamethoxazole | 835       | 121         |
| tobramycin                    | 658       | 296         |
| tetracycline                  | 710       | 198         |
| ampicillin/sulbactam          | 464       | 421         |
| ceftriaxone                   | 777       | 57          |
| levofloxacin                  | 671       | 153         |
| ampicillin                    | 799       | 1           |
| cefotaxime                    | 755       | 29          |
| aztreonam                     | 768       | 2           |
| cefazolin                     | 717       | 0           |
| nitrofurantoin                | 696       | 0           |
| meropenem                     | 366       | 204         |
| cefoxitin                     | 503       | 0           |
| cefepime                      | 316       | 18          |
| tigecycline                   | 6         | 212         |
| doripenem                     | 61        | 152         |
| piperacillin/tazobactam       | 189       | 0           |
| carbapenem                    | 105       | 60          |
| ticarcillin/clavulanic acid   | 134       | 3           |
| colistin                      | 13        | 117         |
| cefotetan                     | 112       | 0           |
| moxifloxacin                  | 60        | 31          |
| polymyxin B                   | 8         | 78          |
| minocycline                   | 17        | 56          |
| ertapenem                     | 71        | 0           |
| azidothymidine                | 49        | 0           |
| piperacillin                  | 48        | 0           |
| ticarcillin                   | 46        | 0           |
| timentin                      | 34        | 4           |
| amoxicillin/clavulanic acid   | 27        | 0           |
| kanamycin                     | 24        | 0           |
| sulphonamides                 | 24        | 0           |
| streptomycin                  | 23        | 0           |
| spectinomycin                 | 22        | 0           |
| nalidixic acid                | 21        | 0           |

---

|                  |    |   |
|------------------|----|---|
| neomycin         | 21 | 0 |
| trimethoprim     | 20 | 0 |
| cefuroxime       | 6  | 0 |
| chloramphenicol  | 3  | 0 |
| netilmicin       | 3  | 0 |
| azithromycin     | 1  | 0 |
| benzylpenicillin | 1  | 0 |
| clarithromycin   | 1  | 0 |
| daptomycin       | 1  | 0 |
| erythromycin     | 1  | 0 |
| fosfomicin       | 1  | 0 |
| linezolid        | 1  | 0 |
| rifampin         | 1  | 0 |
| teicoplanin      | 1  | 0 |
| vancomycin       | 1  | 0 |

---

Table S2. Numbers of resistant and susceptible strains for the selected drugs of *Escherichia coli*. Yellow entries indicate the drug datasets analyzed in this study.

| Antibiotic drugs              | Resistant | Susceptible |
|-------------------------------|-----------|-------------|
| ciprofloxacin                 | 530       | 1460        |
| gentamicin                    | 222       | 1735        |
| ceftazidime                   | 256       | 1632        |
| amoxicillin/clavulanic acid   | 570       | 1148        |
| piperacillin/tazobactam       | 154       | 1535        |
| tigecycline                   | 2         | 1537        |
| cefotaxime                    | 205       | 1326        |
| cefuroxime                    | 245       | 1266        |
| imipenem                      | 42        | 1214        |
| amoxicillin                   | 663       | 434         |
| ampicillin                    | 707       | 238         |
| meropenem                     | 57        | 820         |
| amikacin                      | 27        | 842         |
| cefepime                      | 135       | 700         |
| tobramycin                    | 124       | 654         |
| ertapenem                     | 63        | 634         |
| cefoxitin                     | 112       | 477         |
| trimethoprim                  | 259       | 320         |
| aztreonam                     | 159       | 409         |
| ceftriaxone                   | 292       | 201         |
| tetracycline                  | 276       | 179         |
| trimethoprim/sulfamethoxazole | 192       | 103         |
| levofloxacin                  | 217       | 66          |
| nitrofurantoin                | 13        | 268         |
| cefalotin                     | 60        | 191         |
| chloramphenicol               | 50        | 194         |
| cefazolin                     | 208       | 13          |
| streptomycin                  | 93        | 98          |
| azithromycin                  | 16        | 156         |
| sulfamethoxazole              | 112       | 58          |
| norfloxacin                   | 28        | 136         |
| ampicillin/sulbactam          | 83        | 9           |
| doripenem                     | 24        | 60          |
| nalidixic acid                | 28        | 22          |
| cephalothin                   | 43        | 2           |
| ceftiofur                     | 41        | 1           |
| sulfisoxazole                 | 35        | 1           |
| cefazoline                    | 15        | 11          |
| gentamycin                    | 7         | 19          |
| sulfamethoxazole/trimethoprim | 7         | 19          |
| colistin                      | 3         | 14          |



---

|                             |   |    |
|-----------------------------|---|----|
| ceftazidime/avibactam       | 4 | 11 |
| Fosfomicin                  | 2 | 10 |
| ceftolozane/tazobactam      | 3 | 4  |
| kanamycin                   | 1 | 6  |
| moxifloxacin                | 5 | 2  |
| doxycycline                 | 2 | 4  |
| minocycline                 | 2 | 4  |
| piperacillin                | 4 | 2  |
| augmentin                   | 4 | 0  |
| chloram                     | 0 | 4  |
| nalidixate                  | 4 | 0  |
| sulfixazole                 | 4 | 0  |
| tms                         | 4 | 0  |
| cefotetan                   | 0 | 3  |
| ceftaroline                 | 3 | 0  |
| ticarcillin/clavulanic acid | 2 | 1  |
| cefotaxime/clavulanic acid  | 2 | 0  |
| ticarcillin                 | 1 | 1  |
| benzylpenicillin            | 1 | 0  |
| cefalexin                   | 1 | 0  |
| cephalexin                  | 1 | 0  |
| clarithromycin              | 1 | 0  |
| clindamycin                 | 1 | 0  |
| daptomycin                  | 1 | 0  |
| erythromycin                | 1 | 0  |
| linezolid                   | 1 | 0  |
| netilmicin                  | 1 | 0  |
| rifampin                    | 1 | 0  |
| sulbactam                   | 1 | 0  |
| teicoplanin                 | 1 | 0  |
| temocillin                  | 1 | 0  |
| vancomycin                  | 1 | 0  |

---

Table S3. Numbers of resistant and susceptible strains for the selected drugs of *Klebsiella pneumoniae*. Yellow entries indicate the drug datasets analyzed in this study.

| Antibiotic drugs              | Resistant | Susceptible |
|-------------------------------|-----------|-------------|
| ciprofloxacin                 | 1993      | 351         |
| trimethoprim/sulfamethoxazole | 1764      | 579         |
| gentamicin                    | 990       | 1293        |
| meropenem                     | 855       | 1385        |
| ceftazidime                   | 1987      | 166         |
| ampicillin                    | 2082      | 4           |
| cefazolin                     | 1892      | 187         |
| ceftriaxone                   | 1896      | 175         |
| imipenem                      | 818       | 1240        |
| amikacin                      | 222       | 1810        |
| levofloxacin                  | 1636      | 389         |
| aztreonam                     | 1718      | 226         |
| cefoxitin                     | 1108      | 824         |
| piperacillin/tazobactam       | 1354      | 549         |
| tobramycin                    | 1111      | 750         |
| cefepime                      | 1237      | 581         |
| tetracycline                  | 898       | 837         |
| ampicillin/sulbactam          | 1594      | 91          |
| cefuroxime/sodium             | 1449      | 91          |
| nitrofurantoin                | 811       | 92          |
| ertapenem                     | 497       | 94          |
| cefotaxime                    | 421       | 6           |
| amoxicillin/clavulanic acid   | 291       | 119         |
| tigecycline                   | 19        | 320         |
| doripenem                     | 218       | 27          |
| ticarcillin/clavulanic acid   | 75        | 92          |
| trimethoprim                  | 60        | 96          |
| ceftazidime                   | 20        | 92          |
| norfloxacin                   | 13        | 96          |
| colistin                      | 31        | 74          |
| cefotaxime                    | 92        | 4           |
| cephalothin                   | 73        | 5           |
| ofloxacin                     | 44        | 27          |
| chloramphenicol               | 40        | 20          |
| polymyxin B                   | 8         | 48          |
| cefuroxime                    | 50        | 4           |
| cefalotin                     | 44        | 1           |
| doxycycline                   | 6         | 35          |
| minocycline                   | 4         | 31          |
| cefotaxime/clavulanic acid    | 24        | 0           |
| fosfomycin                    | 13        | 1           |

---

|                         |    |   |
|-------------------------|----|---|
| amoxicillin/clavulanate | 12 | 0 |
| florfenicol             | 10 | 2 |
| ceftazidime-avibactam   | 2  | 7 |
| moxifloxacin            | 7  | 0 |
| piperacillin            | 6  | 1 |
| cefotetan               | 2  | 3 |
| ceftolozane-tazobactam  | 4  | 0 |
| cefalexin               | 3  | 0 |
| sulbactam               | 3  | 0 |
| amoxicillin             | 2  | 0 |
| azithromycin            | 2  | 0 |
| benzylpenicillin        | 2  | 0 |
| ceftaroline             | 2  | 0 |
| clarithromycin          | 2  | 0 |
| daptomycin              | 2  | 0 |
| erythromycin            | 2  | 0 |
| linezolid               | 2  | 0 |
| rifampin                | 2  | 0 |
| sulfamethoxazole        | 2  | 0 |
| teicoplanin             | 2  | 0 |
| vancomycin              | 2  | 0 |
| clindamycin             | 1  | 0 |

---

Table S4. Numbers of resistant and susceptible strains for the selected drugs of *Staphylococcus aureus*. Yellow entries indicate the drug datasets analyzed in this study.

| Antibiotic drugs              | R    | S    |
|-------------------------------|------|------|
| methicillin                   | 735  | 879  |
| gentamicin                    | 172  | 1410 |
| erythromycin                  | 519  | 1060 |
| penicillin                    | 1131 | 178  |
| tetracycline                  | 206  | 1058 |
| ciprofloxacin                 | 467  | 765  |
| fusidic acid                  | 83   | 1144 |
| rifampin                      | 23   | 1134 |
| vancomycin                    | 0    | 1150 |
| clindamycin                   | 384  | 522  |
| trimethoprim/sulfamethoxazole | 169  | 434  |
| mupirocin                     | 7    | 537  |
| trimethoprim                  | 15   | 499  |
| oxacillin                     | 63   | 305  |
| levofloxacin                  | 31   | 279  |
| cefoxitin                     | 34   | 246  |
| fosfomycin                    | 1    | 249  |
| linezolid                     | 0    | 91   |
| doxycycline                   | 1    | 49   |
| daptomycin                    | 1    | 36   |
| ceftaroline                   | 1    | 29   |
| amoxicillin/clavulanic acid   | 10   | 9    |
| chloramphenicol               | 1    | 13   |
| ampicillin                    | 9    | 0    |
| ampicillin/sulbactam          | 2    | 7    |
| cefazolin                     | 2    | 7    |
| ceftriaxone                   | 2    | 7    |
| moxifloxacin                  | 0    | 9    |
| cephalothin                   | 7    | 0    |
| imipenem                      | 0    | 7    |
| meropenem                     | 0    | 7    |
| ofloxacin                     | 3    | 4    |
| tigecycline                   | 0    | 5    |
| minocycline                   | 0    | 4    |
| teicoplanin                   | 0    | 3    |
| nitrofurantoin                | 0    | 2    |
| dicloxacillin                 | 1    | 0    |
| quinupristin/dalfopristin     | 0    | 1    |
| tobramycin                    | 1    | 0    |

Table S5. Proportion of hypothetical proteins and mobile element-related genes of those selected using the incremental gene selection method on top of XGBoost feature selection results.

| Species                        | Drug                          | Hypothetical proteins | Mobile-related genes |
|--------------------------------|-------------------------------|-----------------------|----------------------|
| <i>Escherichia coli</i>        | amoxicillin                   | 47.5%                 | 20.5%                |
|                                | amoxicillin/clavulanic acid   | 48.0%                 | 19.1%                |
|                                | ampicillin                    | 45.1%                 | 18.6%                |
|                                | aztreonam                     | 18.2%                 | 45.5%                |
|                                | cefalotin                     | 58.6%                 | 10.3%                |
|                                | cefepime                      | 52.9%                 | 17.6%                |
|                                | cefotaxime                    | 51.9%                 | 13.8%                |
|                                | cefoxitin                     | 48.2%                 | 18.0%                |
|                                | ceftazidime                   | 50.9%                 | 19.1%                |
|                                | cefuroxime                    | 54.7%                 | 21.8%                |
|                                | ciprofloxacin                 | 45.1%                 | 21.2%                |
|                                | gentamicin                    | 34.4%                 | 28.1%                |
|                                | levofloxacin                  | 39.9%                 | 21.9%                |
|                                | tetracycline                  | 59.3%                 | 16.9%                |
|                                | tobramycin                    | 56.4%                 | 14.9%                |
| trimethoprim                   | 54.9%                         | 19.7%                 |                      |
| trimethoprim/sulfamethoxazole  | 44.7%                         | 20.1%                 |                      |
| <i>Acinetobacter baumannii</i> | amikacin                      | 62.5%                 | 8.8%                 |
|                                | ampicillin/sulbactam          | 67.3%                 | 6.3%                 |
|                                | ceftazidime                   | 70.7%                 | 9.2%                 |
|                                | gentamicin                    | 70.6%                 | 5.6%                 |
|                                | imipenem                      | 67.3%                 | 4.1%                 |
|                                | levofloxacin                  | 68.5%                 | 7.7%                 |
|                                | meropenem                     | 69.4%                 | 5.6%                 |
|                                | tetracycline                  | 64.3%                 | 13.2%                |
|                                | tobramycin                    | 59.0%                 | 7.6%                 |
|                                | trimethoprim/sulfamethoxazole | 56.6%                 | 13.2%                |
| <i>Klebsiella pneumoniae</i>   | amikacin                      | 65.1%                 | 10.4%                |
|                                | amoxicillin/clavulanic acid   | 43.3%                 | 17.5%                |
|                                | aztreonam                     | 58.6%                 | 15.7%                |
|                                | cefepime                      | 61.9%                 | 12.5%                |
|                                | cefoxitin                     | 50.7%                 | 13.2%                |
|                                | ciprofloxacin                 | 57.5%                 | 13.2%                |
|                                | gentamicin                    | 58.7%                 | 7.9%                 |
|                                | imipenem                      | 48.5%                 | 17.6%                |
|                                | levofloxacin                  | 48.1%                 | 18.9%                |
|                                | meropenem                     | 60.4%                 | 12.5%                |
| piperacillin/tazobactam        | 54.7%                         | 14.7%                 |                      |

|                              |                               |       |       |
|------------------------------|-------------------------------|-------|-------|
|                              | tetracycline                  | 55.4% | 13.9% |
|                              | tobramycin                    | 50.5% | 16.2% |
|                              | trimethoprim/sulfamethoxazole | 54.2% | 10.6% |
| <i>Staphylococcus aureus</i> | ciprofloxacin                 | 57.4% | 23.4% |
|                              | clindamycin                   | 33.3% | 23.8% |
|                              | erythromycin                  | 35.3% | 17.6% |
|                              | gentamicin                    | 40.0% | 40.0% |
|                              | methicillin                   | 62.5% | 12.5% |
|                              | penicillin                    | 48.3% | 17.2% |
|                              | tetracycline                  | 62.5% | 18.8% |
|                              | trimethoprim/sulfamethoxazole | 61.0% | 17.1% |

Table S6. Distribution of hypothetical gene proportion for bacterial genomes and potential AMR resistance genes identified by the incremental approach.

| Species                        | Mean (std) of bacterial genomes | Mean (std) of potential AMR genes | Wilcoxon rank sum test p-value |
|--------------------------------|---------------------------------|-----------------------------------|--------------------------------|
| <i>Acinetobacter baumannii</i> | 0.26 (0.02)                     | 0.64 (0.04)                       | 4.844e-10                      |
| <i>Escherichia coli</i>        | 0.13 (0.02)                     | 0.48 (0.10)                       | 1.199e-12                      |
| <i>Klebsiella pneumoniae</i>   | 0.16 (0.02)                     | 0.56 (0.06)                       | 1.183e-14                      |
| <i>Staphylococcus aureus</i>   | 0.21 (0.01)                     | 0.50 (0.12)                       | 2.164e-07                      |

Table S7. Distribution of mobile-related gene proportion for bacterial genomes and potential AMR resistance genes identified by the incremental approach.

| Species                        | Mean (std) of bacterial genomes | Mean (std) of potential AMR genes | Wilcoxon rank sum test p-value |
|--------------------------------|---------------------------------|-----------------------------------|--------------------------------|
| <i>Acinetobacter baumannii</i> | 0.02 (0.01)                     | 0.08 (0.03)                       | 6.956e-10                      |
| <i>Escherichia coli</i>        | 0.05 (0.02)                     | 0.20 (0.08)                       | 1.157e-13                      |
| <i>Klebsiella pneumoniae</i>   | 0.03 (0.01)                     | 0.13 (0.03)                       | 1.183e-14                      |
| <i>Staphylococcus aureus</i>   | 0.05 (0.02)                     | 0.22 (0.08)                       | 2.164e-07                      |
